# Supplementary material for: Origin and characterization of the oxygen loss phenomenon in the layered oxide cathodes of Li-ion batteries
Source: Royal Society of Chemistry journal article supplement (doi:10.1039/d3mh00780d), 2023-01-01
Supplement: d3mh00780d1.pdf [file d3mh00780d1.pdf]

## Supporting Information

### Origins and characterization of oxygen loss phenomenon in layered oxide cathodes of Li-ion batteries

Junrun Feng<sup>a</sup>, Zhuo Chen<sup>a</sup>, Weihua Zhou<sup>a</sup>, Zhangxiang Hao<sup>a,\*</sup>

Table S1 A summary of different types of LLMO cathodes, with typical examples and their characteristics related to oxygen loss phenomenon. Notes: the value of capacity and voltage hysteresis were obtained from the voltage and discharge/charge profile of these cathode materials.

| Categories                        | LLMO composition                                                                                          | Capacity (mAhg <sup>-1</sup> ) | voltage hysteresis (V vs. Li <sup>+</sup> /Li) | Gas formed during cycling        | CEI composition                                                                                                                            | Thermal instable temperature (°C) |
|-----------------------------------|-----------------------------------------------------------------------------------------------------------|--------------------------------|------------------------------------------------|----------------------------------|--------------------------------------------------------------------------------------------------------------------------------------------|-----------------------------------|
| <b>Traditional LLMO</b>           | LiCoO <sub>2</sub> <sup>1-5</sup>                                                                         | 274                            | ~4.5                                           | O <sub>2</sub> , CO <sub>2</sub> | LiF, Li <sub>2</sub> CO <sub>3</sub> , Li <sub>2</sub> O, Li <sub>x</sub> PF <sub>y</sub> , Li <sub>x</sub> PF <sub>y</sub> O <sub>z</sub> | 240                               |
|                                   | LiNiO <sub>2</sub> <sup>5-8</sup>                                                                         | 275                            | ~4.6                                           | O <sub>2</sub> , CO <sub>2</sub> | Li <sub>2</sub> CO <sub>3</sub> , LiOH                                                                                                     | 200                               |
|                                   | LiMnO <sub>2</sub> <sup>9</sup>                                                                           | 270                            | /                                              | /                                | /                                                                                                                                          | /                                 |
| <b>NMC-based LLMO</b>             | Li(Ni <sub>0.85</sub> Mn <sub>0.075</sub> Co <sub>0.075</sub> )O <sub>2</sub> <sup>10,11</sup>            | 206                            | ~4.2                                           | O <sub>2</sub> , CO <sub>2</sub> | Li <sub>2</sub> CO <sub>3</sub> , LiF, Li <sub>x</sub> PF <sub>y</sub> , Li <sub>x</sub> PF <sub>y</sub> O <sub>z</sub>                    | 225                               |
|                                   | Li(Ni <sub>0.8</sub> Mn <sub>0.1</sub> Co <sub>0.1</sub> )O <sub>2</sub> <sup>11-14</sup>                 | 203                            | ~4.2                                           | O <sub>2</sub> , CO <sub>2</sub> | Li <sub>x</sub> PF <sub>y</sub> O <sub>z</sub> , LiOH, Li <sub>2</sub> O <sub>3</sub> , Li <sub>2</sub> O                                  | 232                               |
|                                   | Li(Ni <sub>0.7</sub> Mn <sub>0.15</sub> Co <sub>0.15</sub> )O <sub>2</sub> <sup>11,12</sup>               | 194                            | 4.3                                            | O <sub>2</sub> , CO <sub>2</sub> | /                                                                                                                                          | 242                               |
|                                   | Li(Ni <sub>0.6</sub> Mn <sub>0.2</sub> Co <sub>0.2</sub> )O <sub>2</sub> <sup>11,12,15</sup>              | 187                            | /                                              | O <sub>2</sub> , CO <sub>2</sub> | Li <sub>2</sub> O <sub>3</sub> , Li <sub>2</sub> O                                                                                         | 264                               |
|                                   | Li(Ni <sub>0.5</sub> Mn <sub>0.2</sub> Co <sub>0.3</sub> )O <sub>2</sub> <sup>11,12,16</sup>              | 175                            | /                                              | O <sub>2</sub> , CO <sub>2</sub> | Li <sub>x</sub> PF <sub>y</sub> , Li <sub>x</sub> PF <sub>y</sub> O <sub>z</sub> , LiF                                                     | 290                               |
|                                   | Li(Ni <sub>1/3</sub> Mn <sub>1/3</sub> Co <sub>1/3</sub> )O <sub>2</sub> <sup>11,12,17,18</sup>           | 163                            | /                                              | O <sub>2</sub> , CO <sub>2</sub> | LiF, Li <sub>2</sub> CO <sub>3</sub>                                                                                                       | 306                               |
| <b>Ni-rich LLMO (Exclude NMC)</b> | Li[Ni <sub>0.5</sub> Mn <sub>0.5</sub> ]O <sub>2</sub> <sup>19,20</sup>                                   | 163                            | ~4.3                                           | /                                | Li <sub>x</sub> PF <sub>y</sub> O <sub>z</sub> , Li <sub>2</sub> CO <sub>3</sub> , LiF                                                     | 307.1                             |
|                                   | Li[Ni <sub>0.6</sub> Mn <sub>0.5</sub> ]O <sub>2</sub> <sup>19</sup>                                      | 165                            | ~4.3                                           | /                                | /                                                                                                                                          | 298.1                             |
|                                   | Li[Ni <sub>0.7</sub> Mn <sub>0.5</sub> ]O <sub>2</sub> <sup>19</sup>                                      | 171                            | ~4.3                                           | /                                | /                                                                                                                                          | 273.7                             |
|                                   | Li[Ni <sub>0.8</sub> Mn <sub>0.5</sub> ]O <sub>2</sub> <sup>19</sup>                                      | 205                            | ~4.3                                           | //                               | /                                                                                                                                          | 249                               |
|                                   | Li[Ni <sub>0.9</sub> Mn <sub>0.5</sub> ]O <sub>2</sub> <sup>19</sup>                                      | 212                            | ~4.3                                           | /                                | /                                                                                                                                          | 230.4                             |
|                                   | LiNi <sub>0.94</sub> Co <sub>0.06</sub> O <sub>2</sub> <sup>21</sup>                                      | ~230                           | ~4.1                                           | /                                | /                                                                                                                                          | 191                               |
|                                   | LiNi <sub>0.9</sub> Co <sub>0.1</sub> O <sub>2</sub> <sup>22</sup>                                        | ~190                           | ~4.2                                           | /                                | /                                                                                                                                          | /                                 |
|                                   | LiNi <sub>0.90</sub> Co <sub>0.07</sub> Mg <sub>0.03</sub> O <sub>2</sub> <sup>23</sup>                   | 228.3                          | ~4.3                                           | /                                | /                                                                                                                                          | 243.7                             |
|                                   | LiAl <sub>0.05</sub> Ni <sub>0.95</sub> O <sub>2</sub> <sup>24</sup>                                      | ~200                           | ~4.5                                           | O <sub>2</sub> , CO <sub>2</sub> | /                                                                                                                                          | /                                 |
|                                   | Li(Ni <sub>0.8</sub> Co <sub>0.15</sub> Al <sub>0.05</sub> )O <sub>2</sub> <sup>21</sup>                  | ~200                           | /                                              | /                                | /                                                                                                                                          | 241                               |
| <b>Li- and Mn-rich LLMO</b>       | xLi <sub>2</sub> MnO <sub>3</sub> (1-x) LiMO <sub>2</sub> <sup>6,25,26</sup>                              | ~300                           | ~4.4                                           | O <sub>2</sub> , CO <sub>2</sub> | /                                                                                                                                          | /                                 |
|                                   | Li <sub>1.286</sub> Ni <sub>0.071</sub> Mn <sub>0.643</sub> O <sub>2</sub> <sup>27</sup>                  | 250                            | ~4.25                                          | O <sub>2</sub> , CO <sub>2</sub> | /                                                                                                                                          | /                                 |
|                                   | Li <sub>1.2</sub> Ni <sub>0.2</sub> Mn <sub>0.6</sub> O <sub>2</sub> <sup>28</sup>                        | ~300                           | ~4.2                                           | /                                | /                                                                                                                                          | /                                 |
|                                   | Li <sub>1.2</sub> Co <sub>0.1</sub> Mn <sub>0.55</sub> Ni <sub>0.15</sub> O <sub>2</sub> <sup>10,29</sup> | ~200                           | /                                              | /                                | LiF, LiPO <sub>3</sub> F <sub>2</sub> , Li <sub>2</sub> CO <sub>3</sub>                                                                    | /                                 |

|                           |                                                                                   |      |      |                           |                                      |   |
|---------------------------|-----------------------------------------------------------------------------------|------|------|---------------------------|--------------------------------------|---|
|                           | $\text{Li}_{1.2}\text{Ni}_{0.13}\text{Mn}_{0.54}\text{Co}_{0.13}\text{O}_2^{30}$  | ~275 | ~4.5 | $\text{O}_2, \text{CO}_2$ | /                                    | / |
| <b>Other Li-rich LLMO</b> | $\text{Li}_2\text{RuO}_3^{31-34}$                                                 | ~164 | ~4.1 | $\text{O}_2, \text{CO}_2$ | $\text{Li}_2\text{CO}_3, \text{LiF}$ | / |
|                           | $\text{Li}_2\text{Ru}_{0.75}\text{Ti}_{0.25}\text{O}_3^{35}$                      | ~180 | ~4.0 | $\text{O}_2, \text{CO}_2$ | /                                    | / |
|                           | $\text{Li}_2\text{Ru}_{0.75}\text{Mn}_{0.25}\text{O}_3^{35}$                      | ~177 | ~4.0 | $\text{O}_2, \text{CO}_2$ | /                                    | / |
|                           | $\text{Li}_2\text{Ru}_{0.75}\text{Fe}_{0.25}\text{O}_3^{35}$                      | ~177 | ~3.9 | $\text{O}_2, \text{CO}_2$ | /                                    | / |
| <b>Other Mn-rich LLMO</b> | $\text{Li}_{0.7}\text{Mn}_{0.78}\text{Co}_{0.22}\text{O}_2^{36}$                  | ~260 | ~4.5 | $\text{O}_2, \text{CO}_2$ | /                                    | / |
|                           | $\text{Li}_{0.75}\text{Mn}_{0.78}\text{Co}_{0.11}\text{Ni}_{0.11}\text{O}_2^{36}$ | ~245 | ~4.5 | $\text{CO}_2$             | /                                    | / |
|                           | $\text{Li}_{0.74}\text{Mn}_{0.78}\text{Ni}_{0.22}\text{O}_2^{36}$                 | ~230 | ~4.3 | $\text{CO}_2$             | /                                    | / |

Table S2 The contribution of highlighted methods and the modification strategies based on the study

| Characterization methods    | Phenomenon detected/ degradation mechanism                                                         | Modification strategies                    | Examples                                                                                                                                                                     | Improvement (Retention, cycles, Current)                                                                                                                                          |
|-----------------------------|----------------------------------------------------------------------------------------------------|--------------------------------------------|------------------------------------------------------------------------------------------------------------------------------------------------------------------------------|-----------------------------------------------------------------------------------------------------------------------------------------------------------------------------------|
| DEMS/OMES<br>Soft-XAS, RIXS | Gaseous products release at high voltage during cycles                                             | Composition design & electrolyte additives | $\text{Al}^{3+}$ substitution in $\text{LiNiO}_2$ :<br>$\text{LiAl}_{0.1}\text{Ni}_{0.9}\text{O}_2^{37}$                                                                     | $\text{LiAl}_{0.1}\text{Ni}_{0.9}\text{O}_2$ : ~100%, 50, 0.4 mA cm <sup>-2</sup><br>$\text{LiNiO}_2$ : 68%, 50, 0.4 mA cm <sup>-2</sup>                                          |
|                             |                                                                                                    |                                            | Addition of Lithium fluoromalonate(difluoro)borate ( $\text{LiFMDFB}$ ) <sup>38</sup>                                                                                        | $\text{LiFMDFB}$ added: 85%, 200, 0.5;<br>Without $\text{LiFMDFB}$ : 40%, 200, 0.5                                                                                                |
| EPR                         | Crystal structures changes during cycling and thermal treatment                                    | Elemental doping                           | Yttrium surface gradient doping in $\text{LiNi}_{0.93}\text{Co}_{0.07}\text{O}_2$ (NC):<br>$\text{LiNi}_{0.91}\text{Co}_{0.07}\text{Y}_{0.02}\text{O}_2$ (NCY) <sup>39</sup> | NC shows a structure transformation from layered to spinel that started at 200 °C, and to spinel at above 300 °C, while NCY shows a much better stability                         |
|                             |                                                                                                    |                                            | Nd/Al dual doped<br>$\text{Li}_{1.2}\text{Mn}_{0.533}\text{Ni}_{0.267}\text{O}_2^{40}$                                                                                       | Nd/Al dual doped $\text{Li}_{1.2}\text{Mn}_{0.533}\text{Ni}_{0.267}\text{O}_2$ : 90.1, 200, 1C;<br>$\text{Li}_{1.2}\text{Mn}_{0.533}\text{Ni}_{0.267}\text{O}_2$ : 76.4, 200, 1C. |
| TEM, XAS, XPS, NMR          | The formation of CEI during the cycles, enhancing the oxygen loss                                  | Coating layer                              | $\text{Li}_2\text{TO}_3$ coating on $\text{LiNi}_{0.5}\text{Mn}_{0.5}\text{O}_2^{20}$                                                                                        | $\text{Li}_2\text{TO}_3$ coated $\text{LiNi}_{0.5}\text{Mn}_{0.5}\text{O}_2$ : 83, 100, 0.2;<br>$\text{LiNi}_{0.5}\text{Mn}_{0.5}\text{O}_2$ : 58, 100, 0.2.                      |
| CT, TXM, ND                 | Cracks formed during the cycles, under cell, electrode, particle level                             | Modification of synthesis condition        | Synthesis of layered nanorod gradient (NRG) $\text{Li}[\text{Ni}_{0.81}\text{Co}_{0.06}\text{Mn}_{0.13}]\text{O}_2$ cathode particle <sup>41</sup>                           | NRG: 88.3%, 1000, 1C<br>$\text{Li}[\text{Ni}_{0.82}\text{Co}_{0.14}\text{Al}_{0.04}]\text{O}$ : 55.9%, 1000, 1C                                                                   |
| TXM                         | Inhomogeneous lithiation across the whole electrode and even single particle                       | To be developed                            |                                                                                                                                                                              |                                                                                                                                                                                   |
| CDI                         | Nano scaled Stain stress arisen at particles under nano scales, inducing the following degradation |                                            |                                                                                                                                                                              |                                                                                                                                                                                   |

- 1 A. Yano, M. Shikano, A. Ueda, H. Sakaebe and Z. Ogumi, *J. Electrochem. Soc.*, 2017, **164**, A6116–A6122.
- 2 H. Wang, Y. Jang, B. Huang, D. R. Sadoway and Y. Chiang, *J. Electrochem. Soc.*, 1999, **146**, 473–480.
- 3 J. N. Zhang, Q. Li, Y. Wang, J. Zheng, X. Yu and H. Li, *Energy Storage Mater.*, 2018, **14**, 1–7.

- 4 Sungjemmenla, S. K. Vineeth, C. B. Soni, V. Kumar and Z. W. Seh, *Energy Technol.*, 2022, **10**, 1–12.
- 5 D. D. MacNeil, Z. Lu, Z. Chen and J. R. Dahn, *J. Power Sources*, 2002, **108**, 8–14.
- 6 J. K. Papp, N. Li, L. A. Kaufman and A. J. Naylor, 1–28.
- 7 C. Lee, Y. Yokoyama, Y. Kondo, Y. Miyahara, T. Abe and K. Miyazaki, *Adv. Energy Mater.*, 2021, **11**, 1–8.
- 8 M. Bianchini, M. Roca-Ayats, P. Hartmann, T. Brezesinski and J. Janek, *Angew. Chemie - Int. Ed.*, 2019, **58**, 10434–10458.
- 9 A. R. ARMSTRONG and P. G. BRUCE, *Nature*, 1996, **381**, 499–500.
- 10 H. Q. Pham, M. Mirolo, M. Tarik, M. El Kazzi and S. Trabesinger, *Energy Storage Mater.*, 2020, **33**, 216–229.
- 11 H. J. Noh, S. Youn, C. S. Yoon and Y. K. Sun, *J. Power Sources*, 2013, **233**, 121–130.
- 12 S. Bak, E. Hu, Y. Zhou, X. Yu, S. D. Senanayake, S. Cho, K. Kim, K. Y. Chung, X. Yang and K. Nam, *Appl. Mater. Interfaces*, 2014, **6**, 22594–22601.
- 13 J. Wandt, A. T. S. Freiberg, A. Ogrodnik and H. A. Gasteiger, *Mater. Today*, 2018, **21**, 825–833.
- 14 W. Wang, Q. Yang, K. Qian and B. Li, *J. Energy Chem.*, 2020, **47**, 72–78.
- 15 H. Gao, F. Maglia, P. Lamp, K. Amine and Z. Chen, *ACS Appl. Mater. Interfaces*, 2017, **9**, 44542–44549.
- 16 M. Hekmatfar, I. Hasa, R. Eghbal, D. V. Carvalho, A. Moretti and S. Passerini, *Adv. Mater. Interfaces*, 2020, **7**, 1–13.
- 17 F. La Mantia, F. Rosciano, N. Tran and P. Novák, *J. Electrochem. Soc.*, 2009, **156**, A823.
- 18 Y. Qian, P. Niehoff, M. Börner, M. Grützke, X. Mönnighoff, P. Behrends, S. Nowak, M. Winter and F. M. Schappacher, *J. Power Sources*, 2016, **329**, 31–40.
- 19 Y. K. Sun, D. J. Lee, Y. J. Lee, Z. Chen and S. T. Myung, *ACS Appl. Mater. Interfaces*, 2013, **5**, 11434–11440.
- 20 G. Jia, S. Liu, G. Yang, F. Li, K. Wu, Z. He and X. Shanguan, *Ionics (Kiel)*, 2019, **25**, 399–410.
- 21 W. Li, A. Dolocan, J. Li, Q. Xie and A. Manthiram, *Adv. Energy Mater.*, 2019, **9**, 1–9.

- 22 D. Li, Z. Peng, H. Ren, W. Guo and Y. Zhou, *Mater. Chem. Phys.*, 2008, **107**, 171–176.
- 23 H. Li, P. Zhou, F. Liu, H. Li, F. Cheng and J. Chen, *Chem. Sci.*, 2019, **10**, 1374–1379.
- 24 N. Li, S. Sallis, J. K. Papp, B. D. McCloskey, W. Yang and W. Tong, *Nano Energy*, ,  
DOI:10.1016/j.nanoen.2020.105365.
- 25 A. Manthiram, J. C. Knight, S. T. Myung, S. M. Oh and Y. K. Sun, *Adv. Energy Mater.*, ,  
DOI:10.1002/aenm.201501010.
- 26 C. S. Johnson, N. Li, C. Lefief and M. M. Thackeray, *Electrochem. commun.*, 2007, **9**, 787–795.
- 27 Y. Zhang, X. Wen, Z. Shi, B. Qiu, G. Chen and Z. Liu, *J. Energy Chem.*, 2023, **82**, 259–267.
- 28 J. Dong, F. Wu, J. Zhao, Q. Shi, Y. Lu, N. Li, D. Cao, W. Li, J. Hao, X. Yang, L. Chen and Y. Su, *Energy Storage Mater.*, 2023, **60**, 102798.
- 29 X. Zhang, H. Jia, Y. Xu, L. Zou, M. H. Engelhard, B. E. Matthews, C. Wang, J. G. Zhang and W. Xu, *J. Power Sources Adv.*, , DOI:10.1016/j.powera.2020.100024.
- 30 T. Liu, J. Liu, L. Li, L. Yu, J. Diao, T. Zhou, S. Li, A. Dai, W. Zhao, S. Xu, Y. Ren, L. Wang, T. Wu, R. Qi, Y. Xiao, J. Zheng, W. Cha, R. Harder, I. Robinson, J. Wen, J. Lu, F. Pan and K. Amine, *Nature*, 2022, **606**, 305–312.
- 31 Y. Yu, P. Karayaylali, D. Sokaras, L. Giordano, R. Kou, C. Sun, F. Maglia, R. Jung, F. S. Gittleson and Y. Shao-horn, 2021, **2**, 2322–2334.
- 32 J. C. Hestenes, A. W. Ells, M. Navarro Goldaraz, I. V. Sergeev, B. Itin and L. E. Marbella, *Front. Chem.*, 2020, **8**, 1–9.
- 33 B. G. Lee and Y. J. Park, *Sci. Rep.*, 2020, **10**, 1–11.
- 34 B. Li, R. Shao, H. Yan, L. An, B. Zhang, H. Wei, J. Ma, D. Xia and X. Han, *Adv. Funct. Mater.*, 2016, **26**, 1330–1337.
- 35 Y. Yu, P. Karayaylali, D. Sokaras, L. Giordano, R. Kou, C. J. Sun, F. Maglia, R. Jung, F. S. Gittleson and Y. Shao-Horn, *Energy Environ. Sci.*, 2021, **14**, 2322–2334.

- 36 W. Huang, C. Lin, M. Zhang, S. Li, Z. Chen, W. Zhao, C. Zhu, Q. Zhao, H. Chen and F. Pan, *Adv. Energy Mater.*, 2021, **11**, 1–11.
- 37 S. H. Park, K. S. Park, Y. Sun Kook, K. S. Nahm, Y. S. Lee and M. Yoshio, *Electrochim. Acta*, 2001, **46**, 1215–1222.
- 38 J. G. Han, J. Bin Lee, A. Cha, T. K. Lee, W. Cho, S. Chae, S. J. Kang, S. K. Kwak, J. Cho, S. Y. Hong and N. S. Choi, *Energy Environ. Sci.*, 2018, **11**, 1552–1562.
- 39 Y. Wang, M. Gao, S. Liu, G. Li and X. Gao, , DOI:10.1021/acsami.0c21990.
- 40 W. Jiang, C. Zhang, Y. Feng, B. Wei, L. Chen, R. Zhang, D. G. Ivey, P. Wang and W. Wei, *Energy Storage Mater.*, 2020, **32**, 37–45.
- 41 H. H. Sun, J. A. Weeks, A. Heller and C. B. Mullins, *ACS Appl. Energy Mater.*, 2019, **2**, 6002–6011.
